# Supplementary material for: Two-dimensional (PEA)2PbBr4 perovskite single crystals for a high performance UV-detector
Source: Royal Society of Chemistry journal article supplement (doi:10.1039/c8tc06129g), 2019-01-01
Supplement: c8tc06129g1.pdf [file c8tc06129g1.pdf]

# Supporting Information

## **Two-Dimensional (PEA)<sub>2</sub>PbBr<sub>4</sub> Perovskite Single Crystals for High Performance UV-Detector**

*Yunxia Zhang<sup>a#</sup>, Yucheng Liu<sup>a#</sup>, Zhuo Xu<sup>a</sup>, Haochen Ye<sup>a</sup>, Qingxian Li<sup>a</sup>, Mingxin Hu<sup>a</sup>,  
Zhou Yang<sup>a\*</sup>, Shengzhong (Frank) Liu<sup>a,b\*</sup>*

<sup>a</sup>Key Laboratory of Applied Surface and Colloid Chemistry, Ministry of Education;  
Shaanxi Key Laboratory for Advanced Energy Devices; Shaanxi Engineering Lab for  
Advanced Energy Technology; Institute for Advanced Energy Materials; School of  
Materials Science and Engineering, Shaanxi Normal University, Xi'an 710119, China.

<sup>b</sup>iChEM, Dalian National Laboratory for Clean Energy; Dalian Institute of Chemical  
Physics, Chinese Academy of Sciences, Dalian, 116023, China.

\*e-mail: szliu@dicp.ac.cn; zyang@snnu.edu.cn

## Experimental Section

**Materials:** N, N-dimethylformamide (DMF, 99.9%) and Lead bromide ( $\text{PbBr}_2$ , 99%) were purchased from Aladdin Reagent Ltd. Phenylethylammonium bromide (PEABr, 99%) was purchased from Xi'an Polymer Light Technology Corp. All the chemicals were used as received without further purification.

**Synthesis of  $(\text{PEA})_2\text{PbBr}_4$  single crystals:** the growth procedure is schematically illustrated in Figure 2a with a facile solvent evaporation method. Briefly, 1.835 g  $\text{PbBr}_2$  and 2.01 g PEABr are dissolved in 4.4 ml DMF at room temperature under stirring to yield 0.873 g/mL  $(\text{PEA})_2\text{PbBr}_4$  precursor solution. After filtration, a transparent solution was produced. The filtrated precursor solution was stored in a beaker sealed with wrap containing 4 holes at room temperature ( $23 \pm 0.5^\circ\text{C}$ ). After several days, the desired  $(\text{PEA})_2\text{PbBr}_4$  single crystals with a size of centimeters were obtained.

**Characterizations:** XRD measurements were performed using Rigaku (Smartlab-9kW) X-ray diffractometer equipped with a Cu  $\text{K}\alpha$  X-ray ( $\lambda = 1.54186 \text{ \AA}$ ) tube operated at 40 kV and 30 mA. The SEM image were collected with a field emission scanning electron microscopy (FE-SEM; SU-8020, Hitachi). The absorption spectra were measured using a Perkin-Elmer Lambda 950 UV-Vis-NIR spectrophotometer in transmission mode with an integrating sphere attachment operating in the 300~800 nm region. The ultraviolet photoelectron spectroscopy was performed with a photoelectron spectrometer (ESCALAB 250Xi, Thermo Fisher Scientific). The steady-state and time resolved photoluminescence measurement were obtained using a PicoQuant FT-300 and MT-100. The Fluorescence quantum yields were determined by Quantaaurus-QY

(Hamamatsu Photonics). Thermogravimetric analysis (TGA) was performed on a TA SDT-Q600 V20.9 (Build 20). The sample was placed in an  $\text{Al}_2\text{O}_3$  crucible and heated in an interval from room temperature to 800 °C at a ramp rate 10 °C min<sup>-1</sup> under flowing nitrogen gas. Approximately 5 mg of  $(\text{PEA})_2\text{PbBr}_4$  single crystal powder was used for experiment.

**Computational details:** In our calculations, the plane wave method in the framework of density-functional theory (DFT) as implemented in the VASP code is employed.<sup>1,2</sup> The projector augmented wave method is used to describe the interaction between ion-cores and valence electrons.<sup>3</sup> The generalized gradient approximation (GGA) with the Perdew Burke Ernzerhof (PBE) functional is used for the exchange-correlation effects,<sup>4</sup> and an energy cutoff of 500 eV is set for the plane wave function's expansion. The spin-orbit coupling was also considered in the electronic structure calculations and the van der Waals (vdW) interaction between 2D layers are described by the DFT-D3 correction.<sup>5,6</sup> A  $\Gamma$ -centered k-point sampling of  $3 \times 3 \times 2$  for Brillouin zone integration are generated using the Monkhorst-Pack scheme. The lattice parameter and atomic positions of the structure is relaxed until the total energy changes were less than  $1.0 \times 10^{-4}$  eV and the maximum force component acting on each atom was less than 0.02 eV Å<sup>-1</sup>.

**Device fabrication and characterization:** To fabricate the planar photodetectors. The interdigital Au electrodes were deposited on the surface  $(\text{PEA})_2\text{PbBr}_4$  single crystals by vacuum evaporation method via successive evaporation deposition of 150 nm Au. The spacing between neighboring fingers was controlled to be 40  $\mu\text{m}$ , while the effective

illuminated area of each device was about  $6 \times 10^{-3} \text{ cm}^2$ . The photo-response characteristics for the devices were collected by using a Keithley 4200 semiconductor characterization system and a manual probe station under various bias voltage and power density with monochromatic LED illumination (wavelength: 365 nm and 265 nm). The fast speed response characteristics of the devices were measured by an optical chopper and a Tektronix MDO 3104 Mixed Domain Oscilloscope. Besides, the irradiation was achieved by using a 375 nm semiconductor laser. Dark current noise was measured by using a spectrum analyzer (Keysight 35670A). A set of optical power meter (VEGA OPHIR PD300-UV) was used to measure the incident powers. All measurements were taken at room temperature.

## Additional data and results

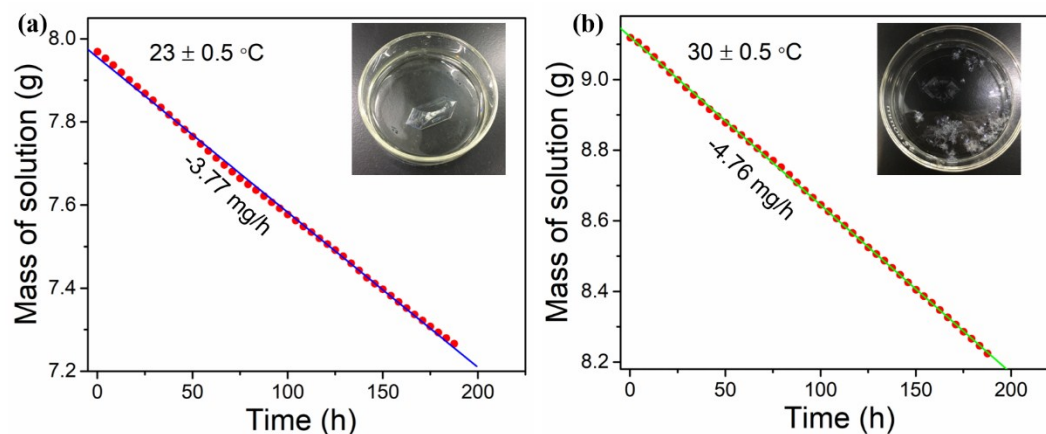

**Figure S1.** Mass of  $(\text{PEA})_2\text{PbBr}_4$  precursor solution as a function of evaporation time at  $23 \pm 0.5\text{ }^{\circ}\text{C}$  and  $30 \pm 0.5\text{ }^{\circ}\text{C}$ . Inset: The photograph of the single crystal.

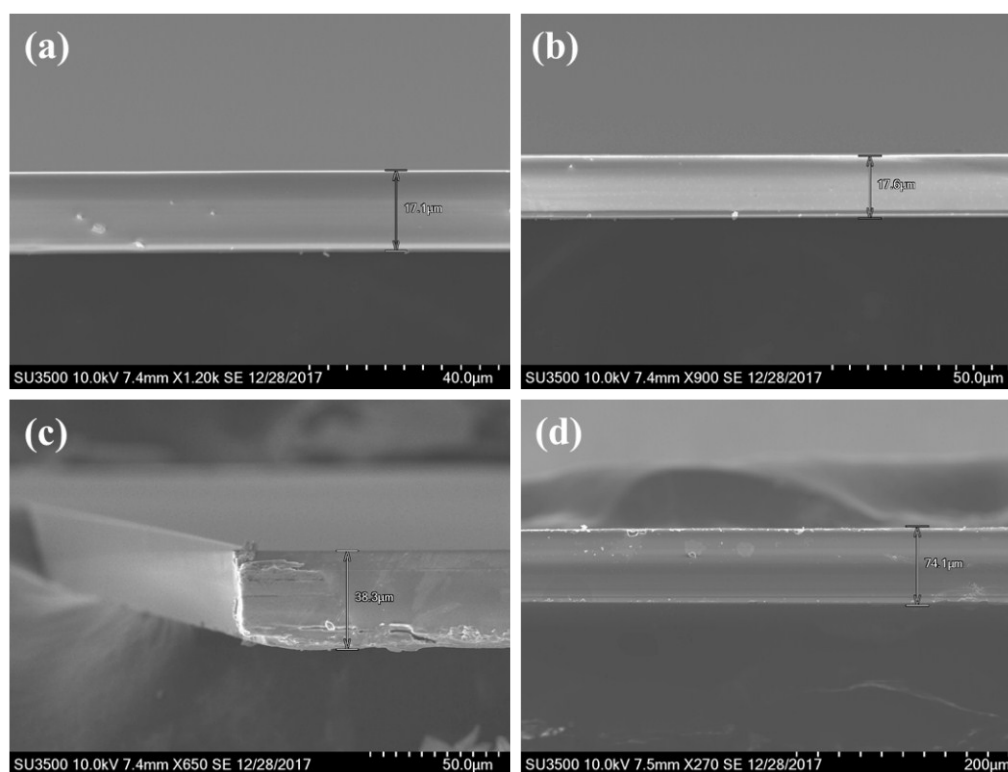

**Figure S2.** Cross-sectional SEM images of the  $(\text{PEA})_2\text{PbBr}_4$  single crystal with different thickness.

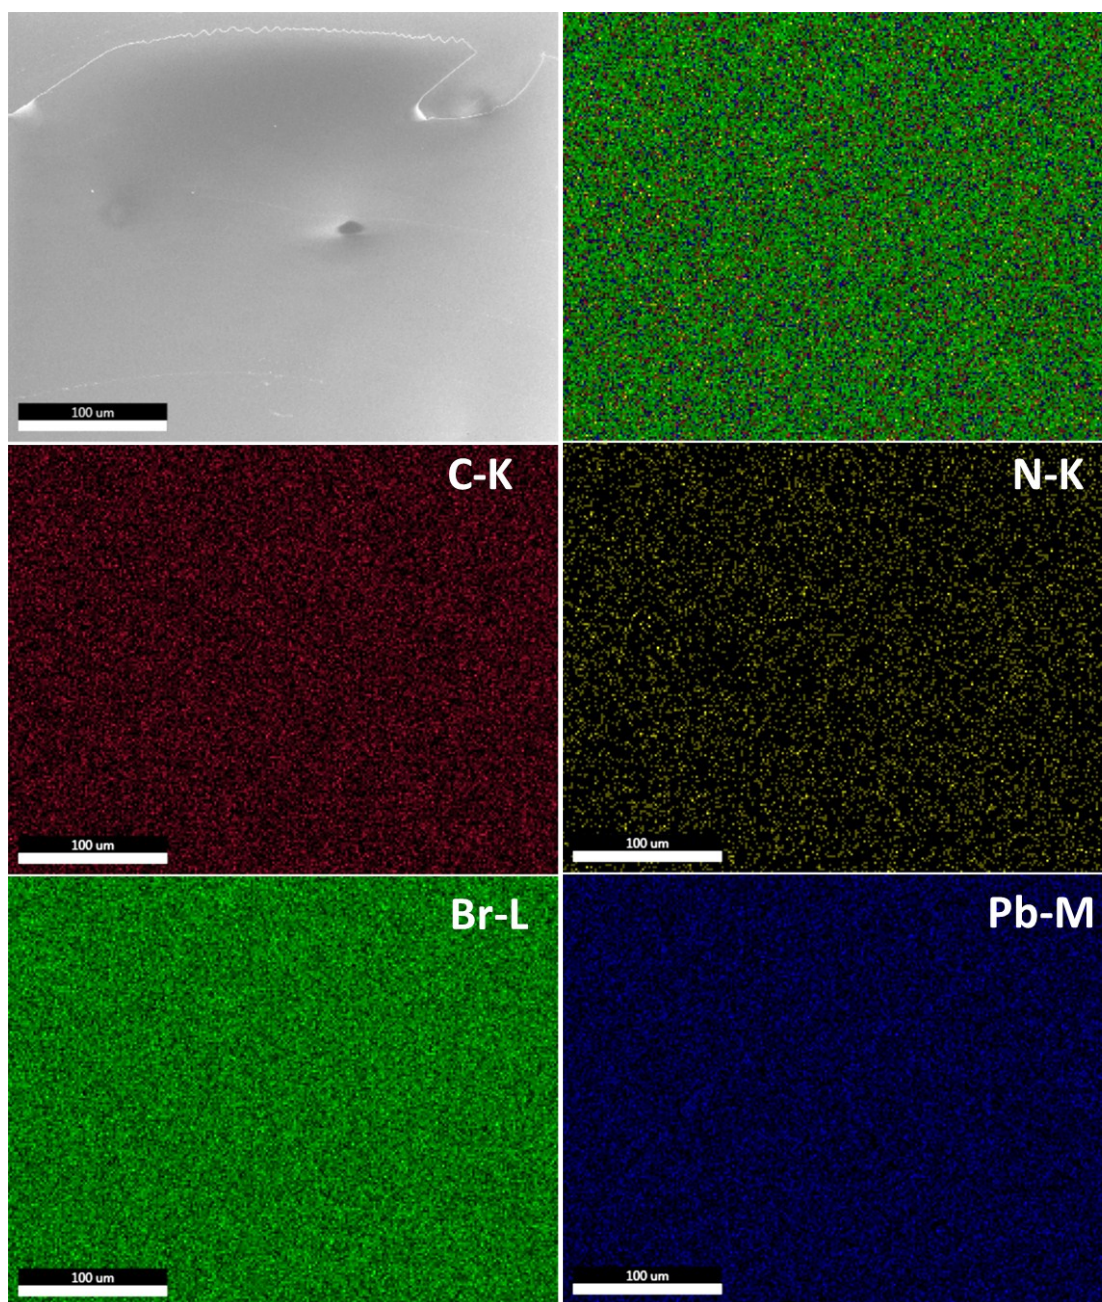

**Figure S3.** EDS mapping scanning measurement of the detected element C, N, Br and Pb.

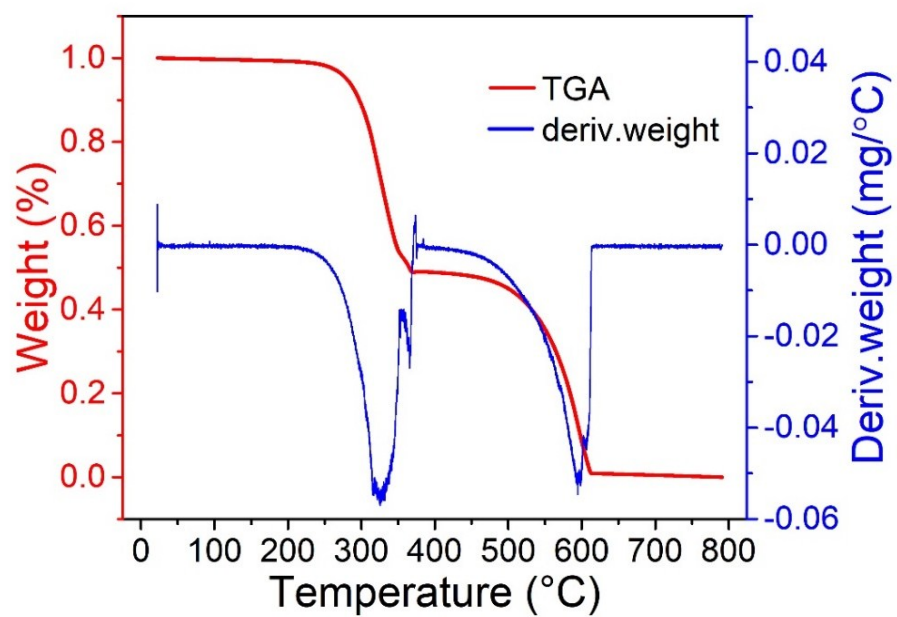

**Figure S4.** TGA curve and corresponding first derivative for the (PEA)<sub>2</sub>PbBr<sub>4</sub> single crystal.

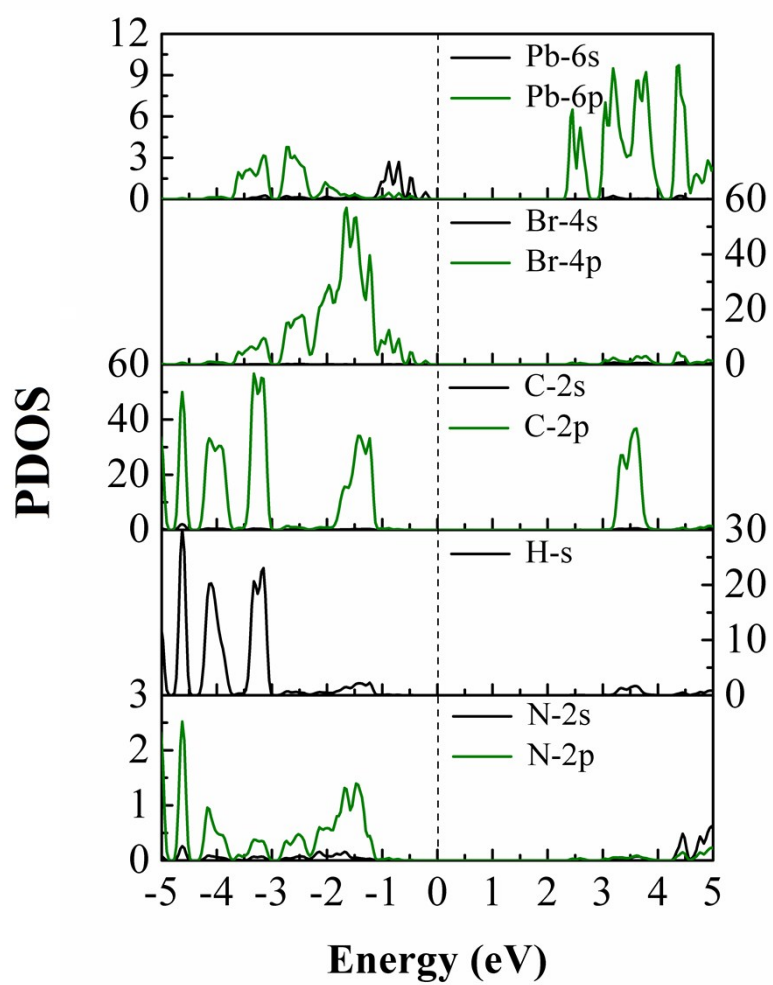

**Figure S5.** The partial density of states of  $(\text{PEA})_2\text{PbBr}_4$ .

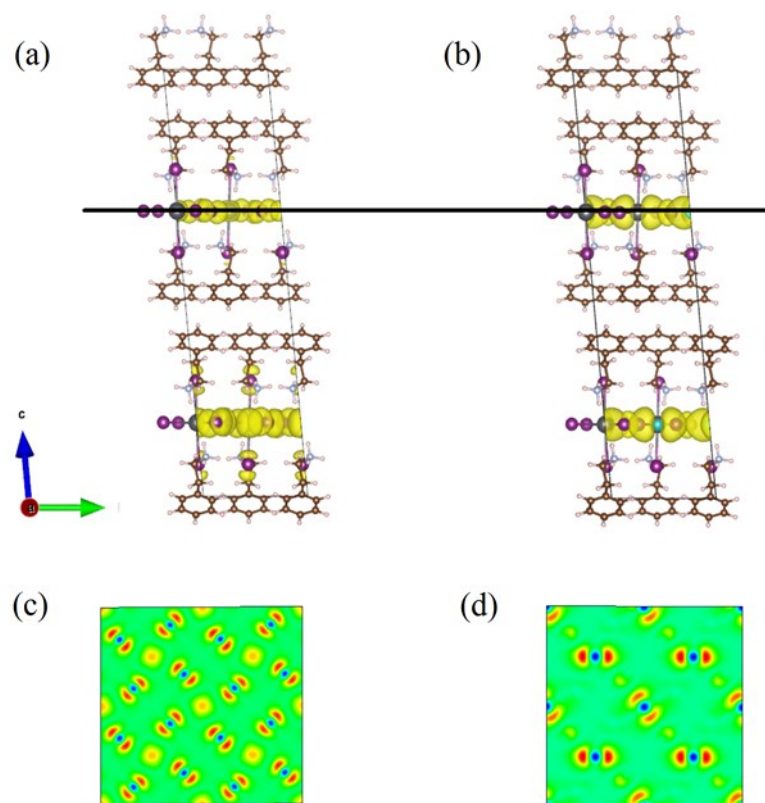

**Figure S6.** Side views of decomposed band charge densities of (a) VBM and (b) CBM, and their corresponding surface slice across the black line (VBM in (c) and CBM in (d)).

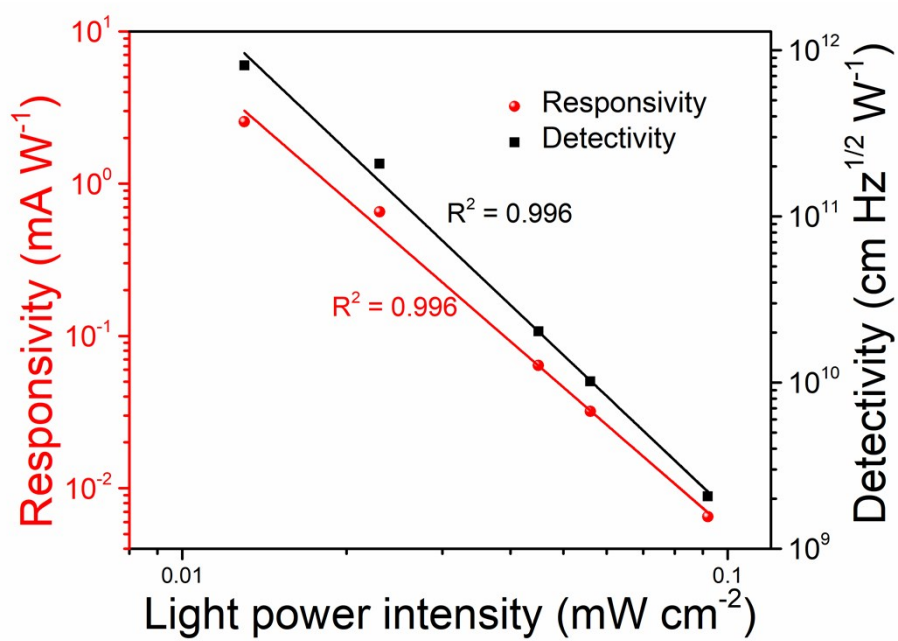

**Figure S7.** Responsivity and detectivity dependence on light irradiance ( $\lambda = 265 \text{ nm}$ ) for (PEA)<sub>2</sub>PbBr<sub>4</sub> photodetector with a bias of 10 V.

**Table S1.** X-ray diffraction data of (PEA)<sub>2</sub>PbBr<sub>4</sub> single crystal.

|                                   |                                                                                                 |
|-----------------------------------|-------------------------------------------------------------------------------------------------|
| Empirical formula                 | (C <sub>6</sub> H <sub>5</sub> C <sub>2</sub> H <sub>4</sub> NH <sub>3</sub> )PbBr <sub>4</sub> |
| Formula weight                    | 771.2                                                                                           |
| Temperature                       | 298 K                                                                                           |
| Wavelength                        | 0.7107                                                                                          |
| Crystal system                    | triclinic                                                                                       |
| Space group                       | P-1                                                                                             |
| Unit cell dimensions              | a = 11.55 $\alpha$ = 99.58°                                                                     |
|                                   | b = 11.56 $\beta$ = 105.88°                                                                     |
|                                   | c = 17.39 $\gamma$ = 89.99°                                                                     |
| volume                            | 2197.65                                                                                         |
| Z                                 | 4                                                                                               |
| Density (calculated)              | 2.27 g cm <sup>-3</sup>                                                                         |
| Absorption coefficient            | 14.5 mm <sup>-1</sup>                                                                           |
| F (000)                           | 1424                                                                                            |
| Crystal size                      | 0.3 × 0.2 × 0.02 mm <sup>3</sup>                                                                |
| Theta range for data coefficient  | 4.685-53.005°                                                                                   |
| Reflections collected             | 88526                                                                                           |
| Absorption correction             | 0.2124-0.7454                                                                                   |
| Max and min transmission          | 0.7454 and 0.2124                                                                               |
| Refinement method                 | Full-matrix least-squares on F <sup>2</sup>                                                     |
| Goodness-of-fit on F <sup>2</sup> | 0.99                                                                                            |

**Table S2.** Comparison of the characteristic parameters of (PEA)<sub>2</sub>PbBr<sub>4</sub> single crystal photodetector and other UV-photodetector devices in the literatures.

| Material                                                            | $\lambda$<br>(nm) | Detectivity<br>(jones) | dark<br>current<br>(nA) | Rise<br>time | Fall<br>time | Reference       |
|---------------------------------------------------------------------|-------------------|------------------------|-------------------------|--------------|--------------|-----------------|
| CH <sub>3</sub> NH <sub>3</sub> PbCl <sub>3</sub><br>single crystal | 365               | $1.2 \times 10^{10}$   | 415                     | 24 ms        | 62 ms        | 7               |
| ZnO thin film                                                       | 380               | -                      | -                       | 48 s         | 0.9 s        | 8               |
| TiO <sub>2</sub> thin film                                          | 260               | -                      | -                       | 6 s          | 15 s         | 9               |
| ZnO nanoflakes                                                      | 380               | $5.25 \times 10^{10}$  |                         | 23 ms        | 26 ms        | 10              |
| TiO <sub>2</sub> nanorod<br>arrays                                  | 365               | -                      | -                       | 150 ms       | 50 ms        | 11              |
| Si:GaN layer                                                        | 365               | $4.87 \times 10^9$     |                         | 29 s         | 141 s        | 12              |
| Se/ZnO p-n<br>heterojunction                                        | 370               | -                      | -                       | 0.69 ms      | 13.5<br>ms   | 13              |
| ZnO/Ga <sub>2</sub> O <sub>3</sub>                                  | 251               | $6.29 \times 10^{12}$  | -                       | 0.1 ms       | 0.9 ms       | 14              |
| MAPbCl <sub>3</sub> film                                            | 385               | $10^{12}$              | ~1                      |              | ~1 ms        | 15              |
| Cs <sub>2</sub> AgInCl <sub>6</sub> SC                              | 365               | $10^{12}$              | 0.01                    | 0.97 ms      | -            | 16              |
| Graphdiyne:ZnO                                                      | 365               | -                      | -                       | 6.1 s        | 2.1 s        | 17              |
| (PEA) <sub>2</sub> PbBr <sub>4</sub> SC                             | 365               | $1.55 \times 10^{13}$  | $2.2 \times 10^{-4}$    | 0.41 ms      | 0.37<br>ms   | Present<br>work |

- (1) G. Kresse, J. Furthmuller, *Comput. Mater. Sci.*, 1996, **6**, 15-50.
- (2) W. Kohn, L. J. Sham, *Phys. Rev.*, 1965, **140**, A1133-A1138.
- (3) P. E. Blochl, *Phys. Rev. B*, 1994, **50**, 17953-17979.
- (4) J. P. Perdew, K. Burke, M. Ernzerhof, *Phys. Rev. Lett.*, 1996, **77**, 3865-3868.
- (5) S. Grimme, J. Antony, S. Ehrlich, H. Krieg, *J. Chem. Phys.*, 2010, **132**, 154104.
- (6) S. Grimme, S. Ehrlich, L. Goerigk, *J. Comput. Chem.*, 2011, **32**, 1456.
- (7) G. Maculan, A. D. Sheikh, A. L. Abdelhady, M. I. Saidaminov, M. A. Haque, B. Murali, E. Alarousu, O. F. Mohammed, T. Wu, O. M. Bakr, *J. Phys. Chem. Lett.*, 2015, **6**, 3781-3786.
- (8) J. H. Jun, H. Seong, K. Cho, B.-M. Moon, S. Kim, *Ceram. Int.*, 2009, **35**, 2797-2801.
- (9) H. Xue, X. Kong, Z. Liu, C. Liu, J. Zhou, W. Chen, S. Ruan, Q. Xu, *Appl. Phys. Lett.*, 2007, **90**, 201118.
- (10) B. Deka Boruah, A. Misra, *ACS Appl. Mater. Interfaces*, 2016, **8**, 18182-18188.
- (11) Y. Xie, L. Wei, G. Wei, Q. Li, D. Wang, Y. Chen, S. Yan, G. Liu, L. Mei, J. Jiao, *Nanoscale Res. Lett.*, 2013, **8**, 188.
- (12) A. R, R. R, L. R, D. S. Vavilapalli, K. Baskar, S. Singh, *Appl. Surf. Sci.*, 2018, **435**, 1057-1064.
- (13) K. Hu, F. Teng, L. Zheng, P. Yu, Z. Zhang, H. Chen, X. Fang, *Laser & Photonics Rev.*, 2017, **11**, 1600257.
- (14) B. Zhao, F. Wang, H. Chen, L. Zheng, L. Su, D. Zhao, X. Fang, *Adv. Funct. Mater.*, 2017, **27**, 1700264.

- (15) V. Adinolfi, O. Ouellette, M. I. Saidaminov, G. Walters, A. L. Abdelhady, O. M. Bakr, E. H. Sargent, *Adv. Mater.*, 2016, **28**, 7264-7268.
- (16) J. Luo, S. Li, H. Wu, Y. Zhou, Y. Li, J. Liu, J. Li, K. Li, F. Yi, G. Niu, J. Tang, *ACS Photonics*, 2017, **5**, 398-405.
- (17) Z. Jin, Q. Zhou, Y. Chen, P. Mao, H. Li, H. Liu, J. Wang, Y. Li, *Adv. Mater.*, 2016, **28**, 3697-3702.
